# Supplementary material
Source: PubMed Central journal article supplement (PMC4135291)
Supplement: 97320630010428S1.pdf [file 97320630010428S1.pdf]

## Supplementary material:

**Table 1:** Docking results of Natural Compounds with HBx: Natural compounds derived from plants: illustrate minimum free energy required for hydrogen bonding.

| S.N. | Natural Compounds | MolDock Score | HBond  | Amino acid residues involved in protein-ligand interactions |
|------|-------------------|---------------|--------|-------------------------------------------------------------|
| 1    | Rutin             | -161.65       | -10.93 | LEU5, ASP48, GLY50, HIS52, LEU93, LYS95, LYS96              |
| 2    | Bilobatin         | -157.37       | -6.59  | LEU5, HIS52, ALA70, ARG72, THR97                            |
| 3    | Curcumin          | -138.55       | -2.73  | LEU71, SER104                                               |
| 4    | Oleanoic acid     | -124.15       | -2.46  | LEU5, SER104                                                |
| 5    | Betulinic acid    | -127.47       | -0.10  | SER104                                                      |
| 6    | Ellagic acid      | -99.88        | -11.21 | LEU71, ARG72, LYS95, THR97, GLY99, SER104                   |
| 7    | Luteoline         | -89.42        | -7.30  | ARG72, SER75, LYS95, THR97                                  |
| 8    | Resveratrol       | -85.23        | -4.48  | LEU5, ASP48, GLY50, ALA51, HIS52, LYS96,                    |

**Table 2:** Docking results of Rutin and its derivative's with HBx protein of HBV: illustrate minimum free energy required for hydrogen bonding

| S.N. | Compounds | R <sub>1</sub>  | R <sub>2</sub>  | R <sub>3</sub>  | R <sub>4</sub>  | R <sub>5</sub>  | R <sub>6</sub>  | R <sub>7</sub>  | R <sub>8</sub>  | R <sub>9</sub>  | MolDock Score | HBond  | Amino acid residues involved in protein-ligand interactions |
|------|-----------|-----------------|-----------------|-----------------|-----------------|-----------------|-----------------|-----------------|-----------------|-----------------|---------------|--------|-------------------------------------------------------------|
| 1    | Rutin     | H               | OH              | H               | OH              | H               | H               | OH              | OH              | H               | -161.65       | -10.93 | LEU5, ASP48, GLY50, HIS52, LEU93, LYS95, LYS96              |
| 2    | Rutin01   | CH <sub>3</sub> | OH              | H               | OH              | H               | H               | OH              | OH              | H               | -163.16       | -13.32 | LEU5, PRO42, ALA70, ARG72, LEU93, LYS96, SER104             |
| 3    | Rutin02   | H               | CH <sub>3</sub> | H               | OH              | H               | H               | OH              | OH              | H               | -159.79       | -13.56 | LEU5, VAL92, LYS95, LYS96, THR97, LEU98                     |
| 4    | Rutin03   | H               | OH              | CH <sub>3</sub> | OH              | H               | H               | OH              | OH              | H               | -145.14       | -11.13 | ALA70, VAL92, LYS95, LEU98                                  |
| 5    | Rutin04   | H               | OH              | H               | CH <sub>3</sub> | H               | H               | OH              | OH              | H               | -154.96       | -12.79 | LEU5, PRO46, ASP48, ALA70, VAL92, LYS96, THR97              |
| 6    | Rutin05   | CH <sub>3</sub> | OH              | H               | CH <sub>3</sub> | H               | H               | OH              | OH              | H               | -157.06       | -09.51 | LEU5, PRO46, THR97, SER104                                  |
| 7    | Rutin06   | H               | CH <sub>3</sub> | H               | CH <sub>3</sub> | H               | H               | OH              | OH              | H               | -109.76       | -13.97 | LEU5, PRO46, ALA70, ARG72, VAL92, LYS96, THR97              |
| 8    | Rutin07   | CH <sub>3</sub> | OH              | H               | CH <sub>3</sub> | H               | H               | OH              | OH              | H               | -159.15       | -14.71 | ALA70, ARG72, VAL92, LYS95, THR97, LEU98                    |
| 9    | Rutin08   | CH <sub>3</sub> | H               | OH              | CH <sub>3</sub> | H               | H               | OH              | OH              | H               | -165.76       | -11.40 | LEU5, ARG72, LEU93, LYS96, LEU98                            |
| 10   | Rutin09   | OH              | OH              | H               | OH              | H               | H               | OH              | OH              | H               | -149.22       | -11.15 | ALA70, VAL92, LYS95, LEU98, THR97                           |
| 11   | Rutin10   | H               | OH              | H               | OH              | H               | H               | OH              | OH              | H               | -156.96       | -06.62 | LEU5, LYS96, LEU98, SER104                                  |
| 12   | Rutin11   | H               | H               | OH              | OH              | H               | CH <sub>3</sub> | OH              | OH              | H               | -139.00       | -17.65 | LEU5, ASP48, ALA70, LYS95, LYS96, THR97, LEU98              |
| 13   | Rutin12   | H               | OH              | H               | OH              | H               | H               | OH              | OH              | CH <sub>3</sub> | -139.44       | -11.90 | LEU5, ALA51, LYS95, LYS96, THR97                            |
| 14   | Rutin13   | H               | OH              | H               | OH              | H               | H               | OH              | CH <sub>3</sub> | H               | -155.55       | -14.45 | LEU5, ALA70, LEU98, GLY99, SER104                           |
| 15   | Rutin14   | H               | OH              | H               | OH              | H               | H               | CH <sub>3</sub> | OH              | H               | -156.65       | -15.98 | LEU5, ALA70, THR97, GLY99, SER104                           |
| 16   | Rutin15   | H               | OH              | H               | OH              | CH <sub>3</sub> | H               | OH              | OH              | H               | -149.60       | -11.55 | PRO46, SER47, LYS95, THR97, LEU98                           |
| 17   | Rutin16   | NH <sub>2</sub> | OH              | H               | OH              | H               | H               | OH              | OH              | H               | -163.95       | -13.01 | LEU5, PRO46, GLY67, LEU93, LYS95, LYS96                     |
| 18   | Rutin17   | H               | OH              | NH <sub>2</sub> | OH              | H               | H               | OH              | OH              | H               | -148.62       | -17.58 | LEU5, ALA51, ALA70, VAL92, LYS95, LEU93, THR97, LEU98       |
| 19   | Rutin18   | H               | OH              | H               | NH <sub>2</sub> | H               | H               | OH              | OH              | H               | -152.44       | -19.05 | LEU5, VAL92, LEU93, LYS96, LEU98, THR97                     |
| 20   | Rutin19   | H               | NH <sub>2</sub> | H               | OH              | H               | H               | OH              | OH              | H               | -120.55       | -16.26 | LEU5, PRO46, LYS96, THR97, LEU98, SER104                    |
| 21   | Rutin20   | NH <sub>2</sub> | OH              | NH <sub>2</sub> | OH              | H               | H               | OH              | OH              | H               | -144.72       | -09.91 | LEU5, PRO42, THR97, SER104                                  |
